# Supplementary material for: Integration of machine learning and genome-scale metabolic modeling identifies multi-omics biomarkers for radiation resistance
Source: Springer Nature journal article supplement (doi:10.1038/s41467-021-22989-1), 2021-05-11
Supplement: 41467_2021_22989_MOESM1_ESM.pdf [file 41467_2021_22989_MOESM1_ESM.pdf]

## Supplementary Figures:

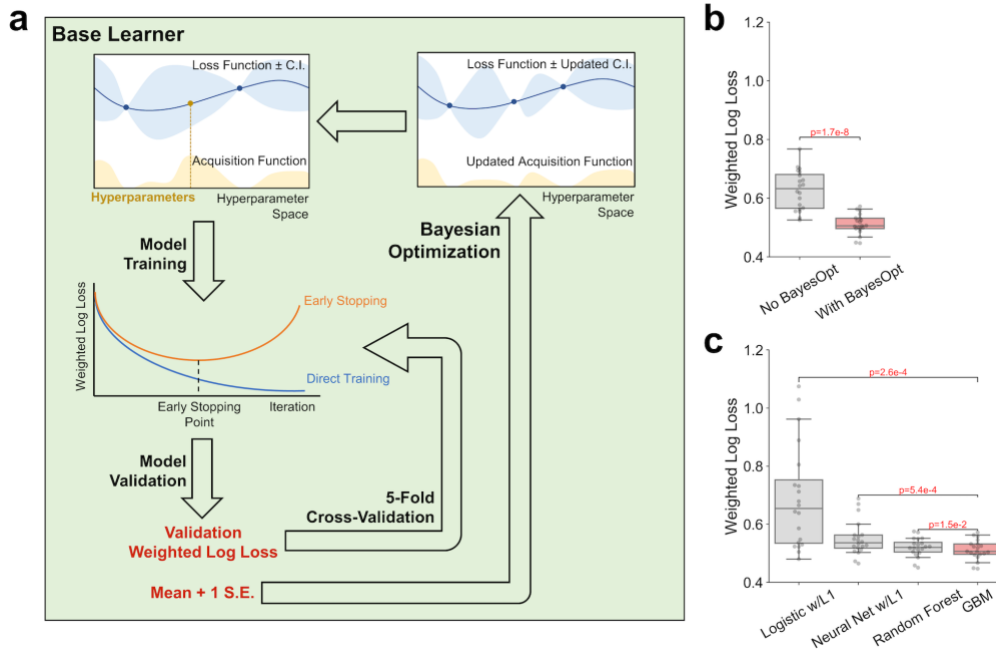

**Supplementary Fig. 1 | Base learner used in the gene expression, multi-omics, and non-invasive classifiers for radiation response.** **a**, Base learner performing two-class classification of radiation response, utilizing a gradient boosting machine (GBM) algorithm with Bayesian optimization, early stopping, and 5-fold cross validation to determine optimal hyperparameter values. Note that for the gene expression classifier, this base learner is not integrated with other base learners or a meta-learner as only one dataset is utilized. **b-c**, Performance of classifier trained on gene expression data from TCGA tumors, comparing **(b)** use of Bayesian optimization compared to no Bayesian optimization, and **(c)** GBM-based classifiers versus other machine learning algorithms.  $n = 20$  training+validation/testing splits. Boxplots: box = 25<sup>th</sup>, 50<sup>th</sup>, and 75<sup>th</sup> percentiles, whiskers = 1.5 times the interquartile range. Statistical test: two-sided t-test.

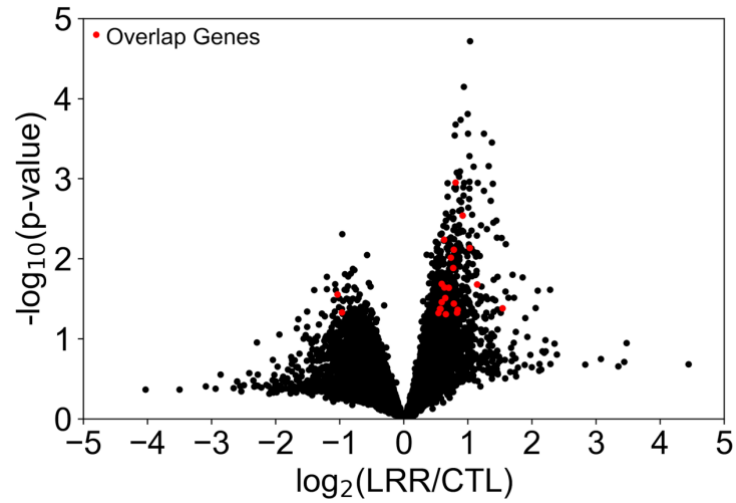

**Supplementary Fig. 2 | Differential gene expression between locoregional recurrence (LRR) and non-recurrent control (CTL) breast cancer tumors from the Keene et al. dataset.** Statistically significant genes that were also among the 782 significant genes from our gene expression classifier trained on TCGA data are highlighted in red and listed in **Supplementary Table 2**.

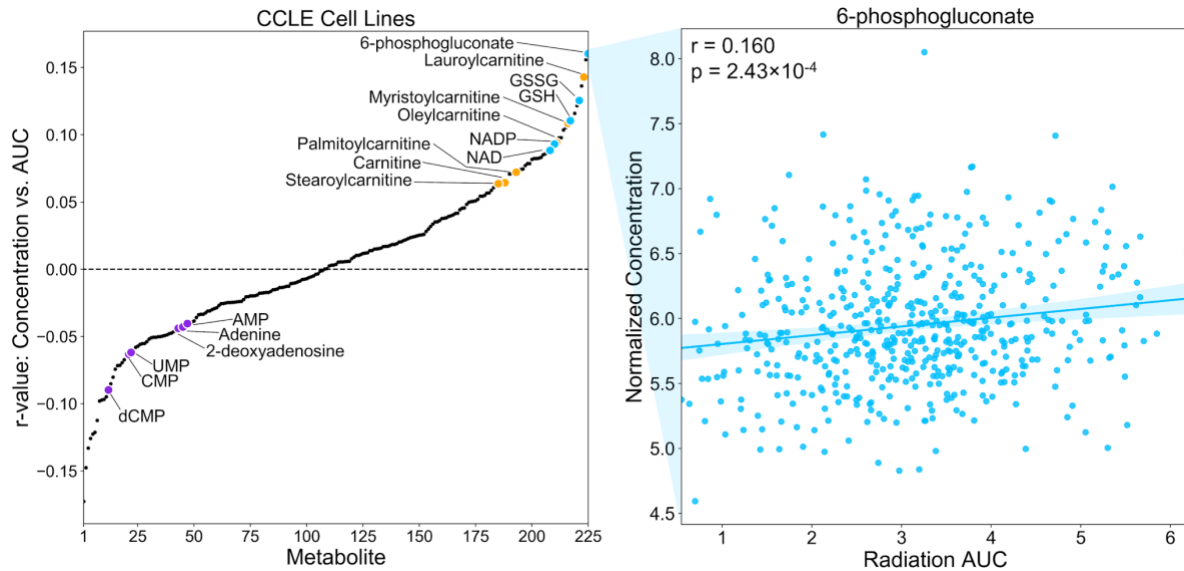

**Supplementary Fig. 3 | Association between cellular metabolomics and radiation response among the CCLE panel of cancer cell lines.** (Left) Correlation between metabolite concentration and radiation resistance (measured using AUC metric) among 225 experimentally-measured metabolites in the CCLE panel. Metabolite classes are colored as in Figure 2. (Right) Example regression between metabolite concentration and AUC for 6-phosphogluconate. Statistical test: one-sample correlation t-test.

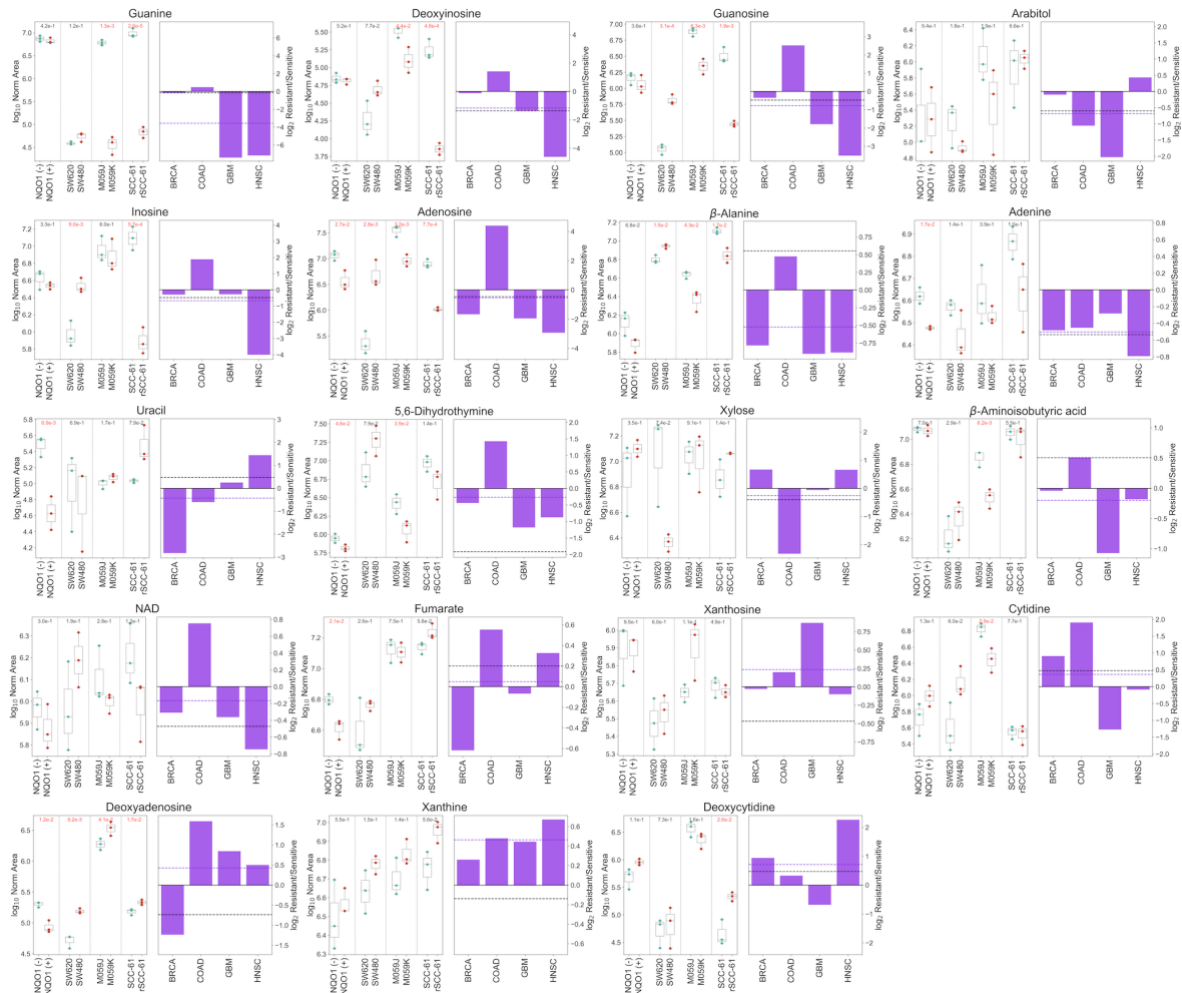

**Supplementary Fig. 4 | Experimentally-measured concentrations of nucleotide metabolites in matched radiation-sensitive and -resistant cell lines.** (Left) Replicate metabolite concentrations from all four cell line pairs, with values expressed as the  $\log_{10}$  normalized area from LC-MS/MS. (Right) Bars: Ratio value for each cell line pair, expressed as the  $\log_2$  ratio of mean radiation-resistant concentration versus mean radiation-sensitive concentration. Colored line: mean experimental  $\log_2$  Resistant/Sensitive across all four cell line pairs. Black line: FBA model-predicted  $\log_2$  ratio of average metabolite production in radiation-resistant versus -sensitive TCGA tumors.  $n = 3$  replicates. Boxplots: box = 25<sup>th</sup>, 50<sup>th</sup>, and 75<sup>th</sup> percentiles, whiskers = 1.5 times the interquartile range. Statistical test: two-sided t-test.

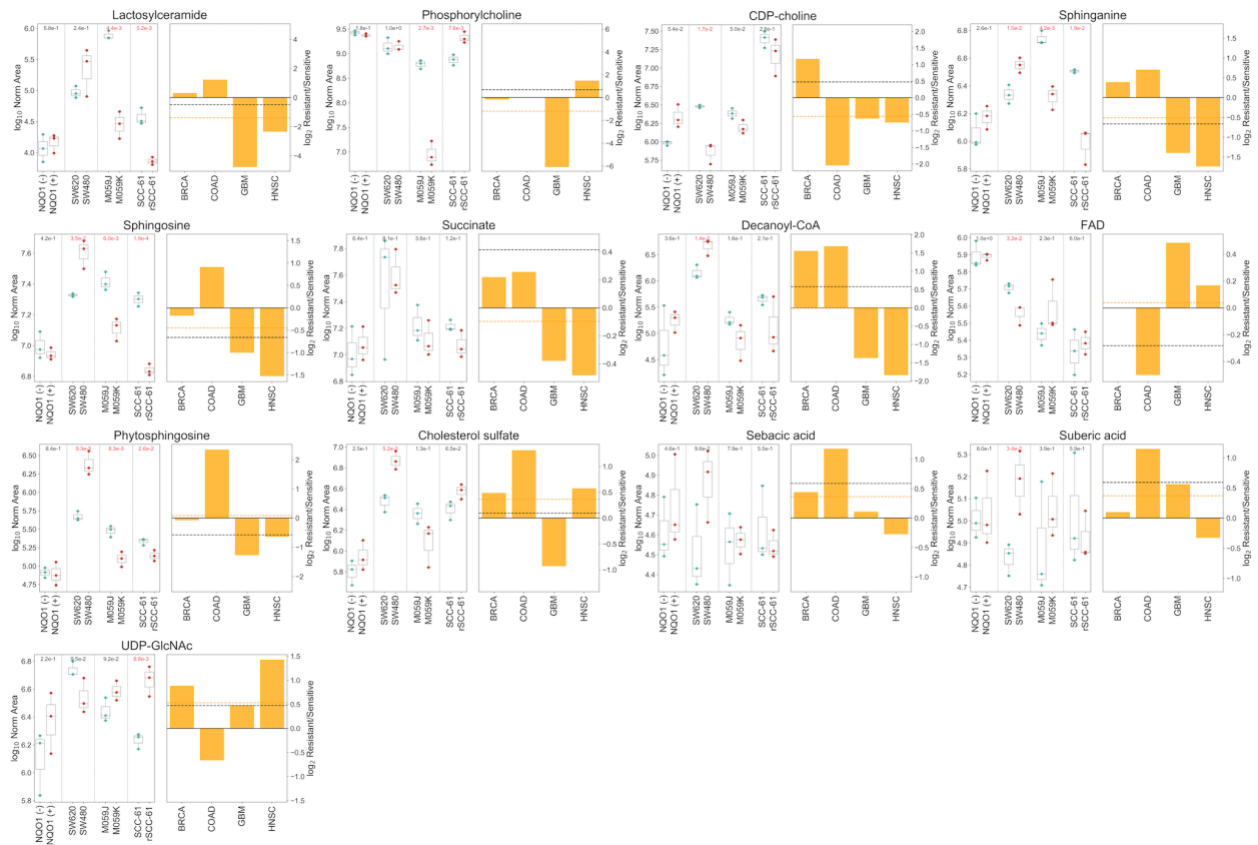

**Supplementary Fig. 5 | Experimentally-measured concentrations of lipid metabolites in matched radiation-sensitive and -resistant cell lines.** (Left) Replicate metabolite concentrations from all four cell line pairs, with values expressed as the  $\log_{10}$  normalized area from LC-MS/MS. (Right) Bars: Ratio value for each cell line pair, expressed as the  $\log_2$  ratio of mean radiation-resistant concentration versus mean radiation-sensitive concentration. Colored line: mean experimental  $\log_2$  Resistant/Sensitive across all four cell line pairs. Black line: FBA model-predicted  $\log_2$  ratio of average metabolite production in radiation-resistant versus -sensitive TCGA tumors.  $n = 3$  replicates. Boxplots: box = 25<sup>th</sup>, 50<sup>th</sup>, and 75<sup>th</sup> percentiles, whiskers = 1.5 times the interquartile range. Statistical test: two-sided t-test.

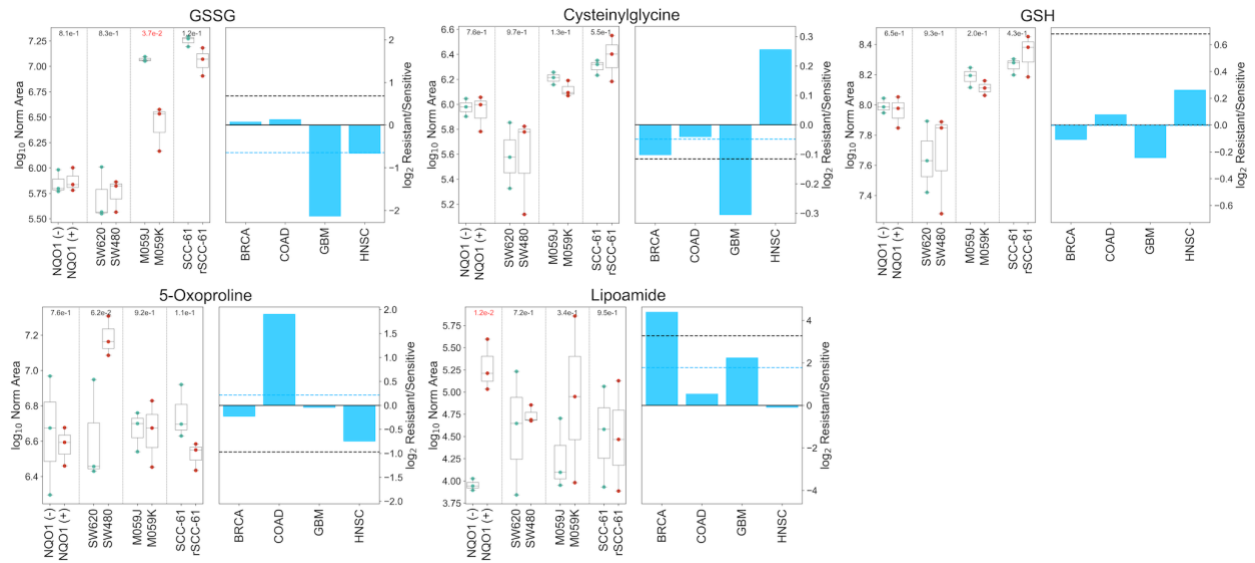

**Supplementary Fig. 6 | Experimentally-measured concentrations of cysteine/antioxidant metabolites in matched radiation-sensitive and -resistant cell lines.** (Left) Replicate metabolite concentrations from all four cell line pairs, with values expressed as the  $\log_{10}$  normalized area from LC-MS/MS. (Right) Bars: Ratio value for each cell line pair, expressed as the  $\log_2$  ratio of mean radiation-resistant concentration versus mean radiation-sensitive concentration. Colored line: mean experimental  $\log_2$  Resistant/Sensitive across all four cell line pairs. Black line: FBA model-predicted  $\log_2$  ratio of average metabolite production in radiation-resistant versus -sensitive TCGA tumors.  $n = 3$  replicates. Boxplots: box = 25<sup>th</sup>, 50<sup>th</sup>, and 75<sup>th</sup> percentiles, whiskers = 1.5 times the interquartile range. Statistical test: two-sided t-test.

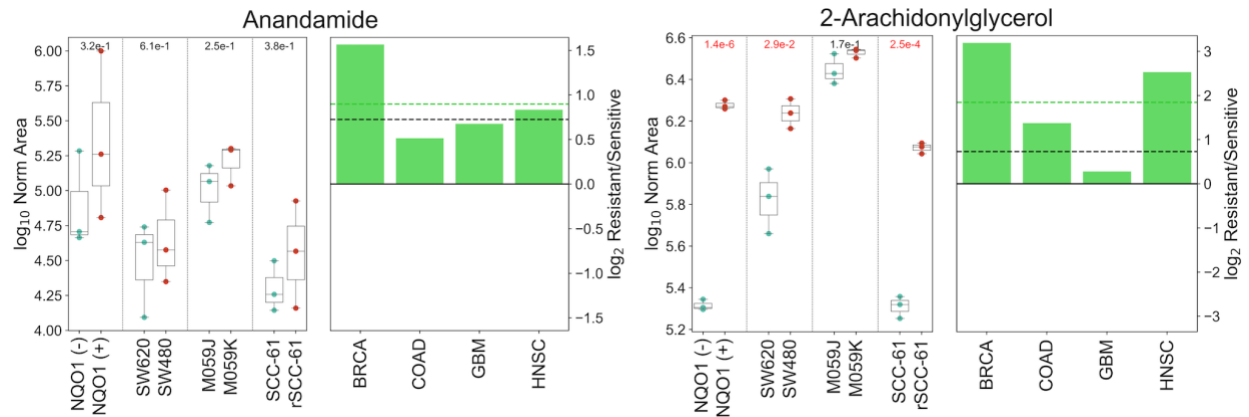

**Supplementary Fig. 7 | Experimentally-measured concentrations of immune system mediating metabolites in matched radiation-sensitive and -resistant cell lines.** (Left) Replicate metabolite concentrations from all four cell line pairs, with values expressed as the  $\log_{10}$  normalized area from LC-MS/MS. (Right) Bars: Ratio value for each cell line pair, expressed as the  $\log_2$  ratio of mean radiation-resistant concentration versus mean radiation-sensitive concentration. Colored line: mean experimental  $\log_2$  Resistant/Sensitive across all four cell line pairs. Black line: FBA model-predicted  $\log_2$  ratio of average metabolite production in radiation-resistant versus -sensitive TCGA tumors.  $n = 3$  replicates. Boxplots: box = 25<sup>th</sup>, 50<sup>th</sup>, and 75<sup>th</sup> percentiles, whiskers = 1.5 times the interquartile range. Statistical test: two-sided t-test.

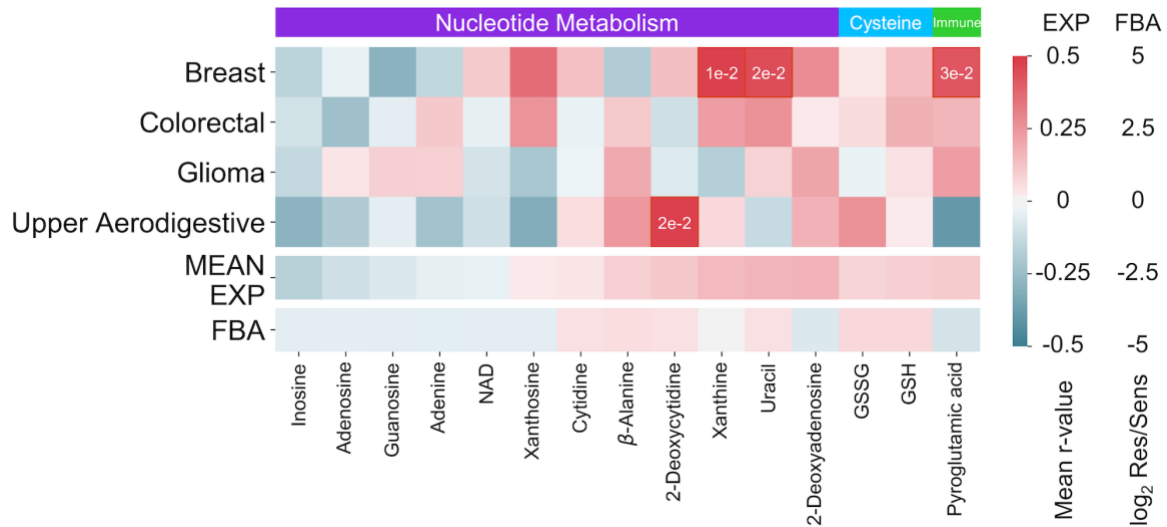

**Supplementary Fig. 8 | Comparison of FBA model-predicted differential metabolite production in TCGA tumors with experimental correlations with radiation AUC in CCLE cell lines among 4 cancer types.** Breast, Colorectal, Glioma, Upper Aerodigestive: average Pearson correlation coefficient between metabolite concentration and cell line AUC among the cell lines listed in **Supplementary Table 4**. Statistically-significant correlations within each cancer type are represented by box outlines and p-values. Number of cell lines for each cancer type is provided in **Supplementary Table 4**. Statistical test: two-sided t-test. MEAN EXP: averaged experimental value across all four cancer types. FBA:  $\log_2$  ratio of FBA model-predicted metabolite production rates in radiation-resistant versus -sensitive TCGA tumors.



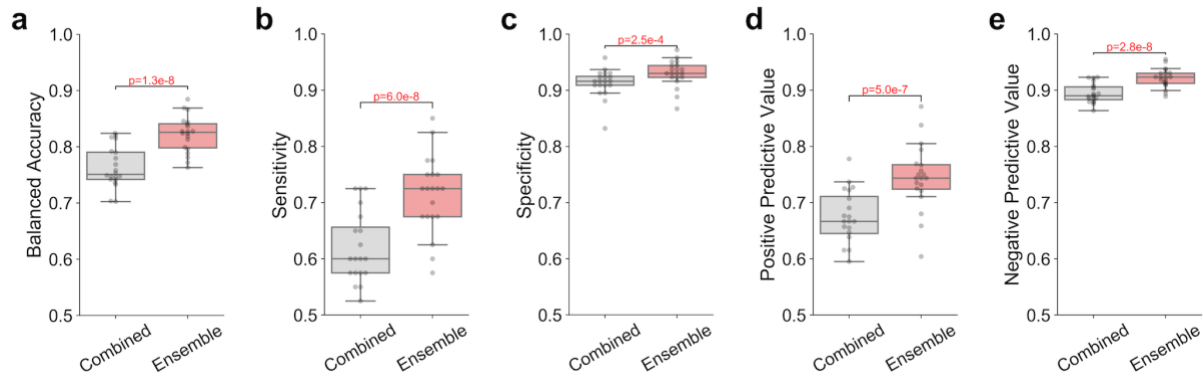

**Supplementary Fig. 9 | Performance of the multi-omics classifier, comparing the dataset-independent ensemble architecture versus combining datasets together before training on a single classifier.** Multiple alternative classifier performance metrics are provided.  $n = 20$  training+validation/testing splits. Boxplots: box = 25<sup>th</sup>, 50<sup>th</sup>, and 75<sup>th</sup> percentiles, whiskers = 1.5 times the interquartile range. Statistical test: two-sided t-test.

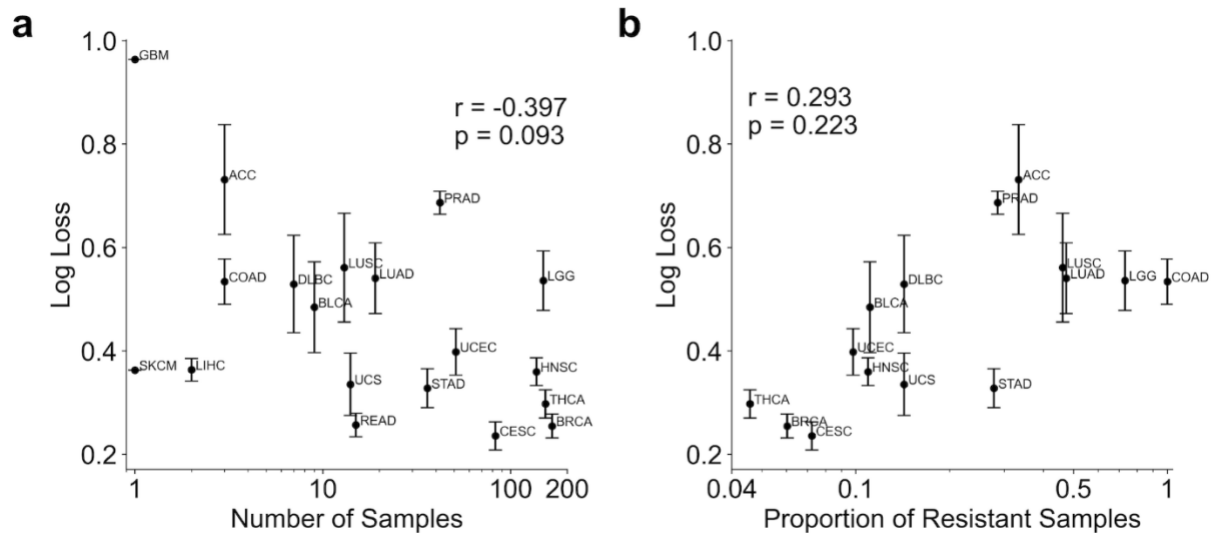

**Supplementary Fig. 10 | Comparison of multi-omics classifier performance on samples from different cancer types. a**, Correlation between sample log loss and number of samples within each cancer type. Error bars: mean  $\pm$  1 standard error. Statistical test: one-sample correlation t-test. **b**, Correlation between sample log loss and proportion of radiation-resistant samples within each cancer type. Number of samples in each cancer types is provided in Dataset 1. Error bars: mean  $\pm$  1 standard error. Statistical test: one-sample correlation t-test.

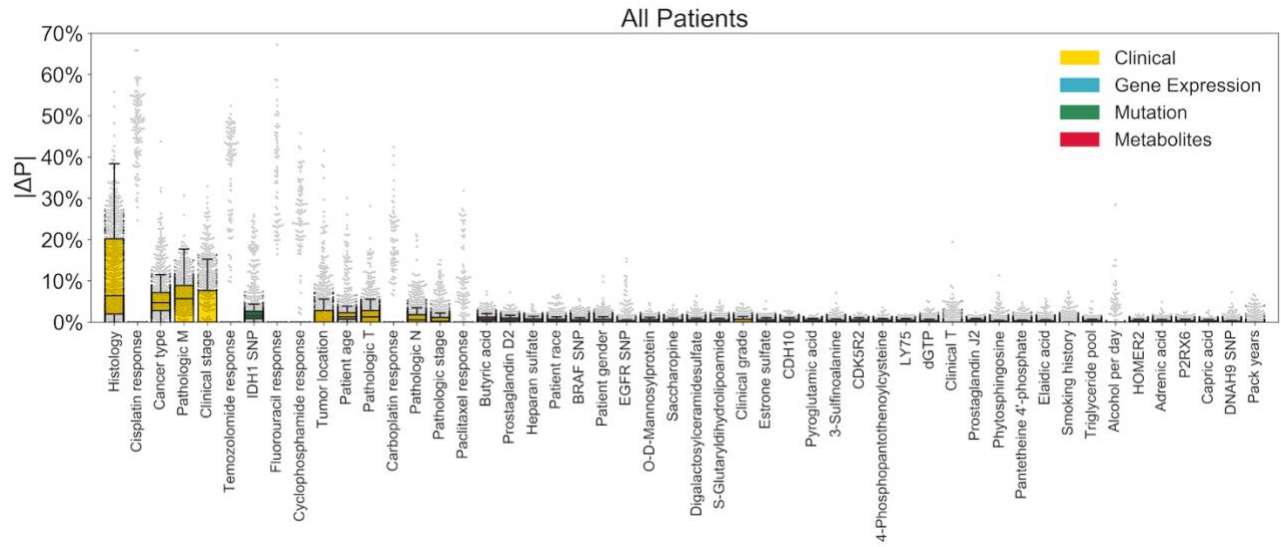

**Supplementary Fig. 11 | Top 50 features with largest mean  $|\Delta P|$  scores, showing individual sample values.  $n = 904$  samples. Boxplots: box = 25<sup>th</sup>, 50<sup>th</sup>, and 75<sup>th</sup> percentiles, whiskers = 1.5 times the interquartile range.**

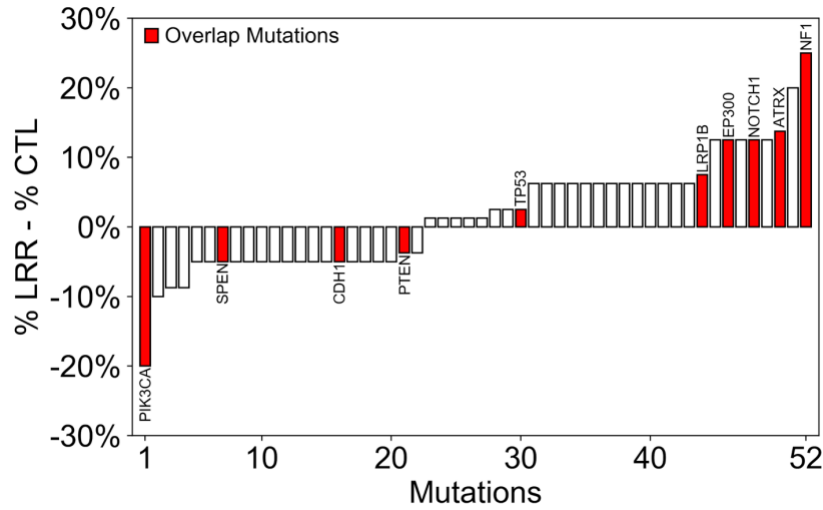

**Supplementary Fig. 12 | Differences in gene mutation rates between locoregional recurrence (LRR) and non-recurrent control (CTL) breast cancer tumors from the Keene et al. dataset.** Gene mutations that were among the 105 gene mutations within the 725 significant features from our multi-omics classifier trained on TCGA data are highlighted in red with their gene names given.

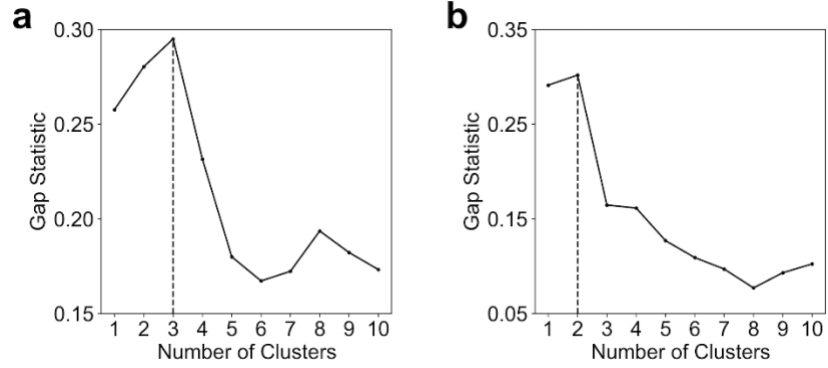

**Supplementary Fig. 13 | *k*-Means clustering of clinical dataset contributions for individual samples.** Gap statistic values for each value of *k* are shown for the (a) multi-omics classifier, and (b) non-invasive classifier.

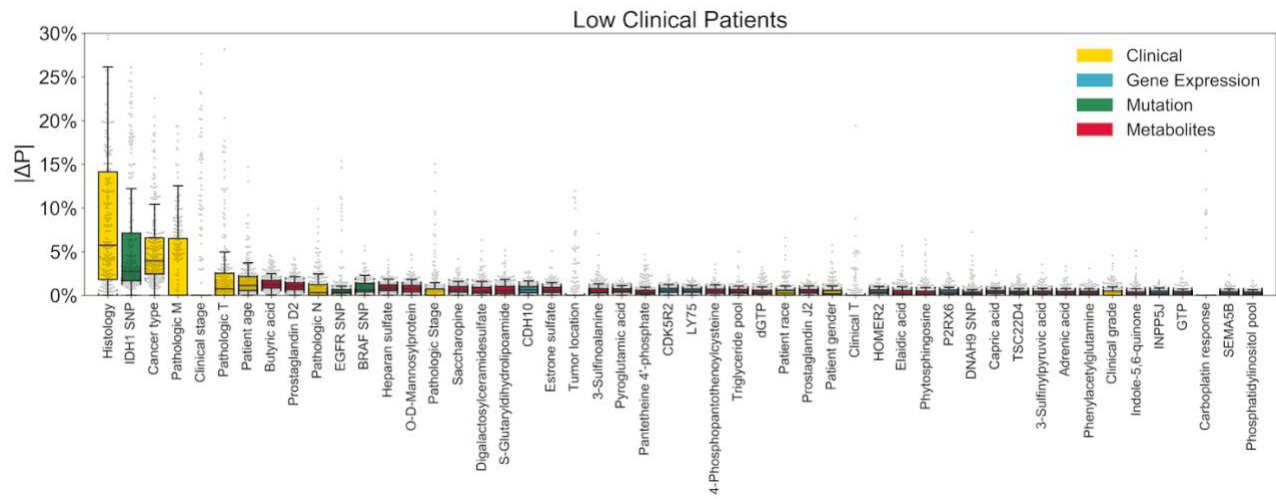

**Supplementary Fig. 14 | Top 50 features with largest mean  $|\Delta P|$  scores among samples within the “Low Clinical” cluster, showing individual sample values.  $n = 249$  samples. Boxplots: box = 25<sup>th</sup>, 50<sup>th</sup>, and 75<sup>th</sup> percentiles, whiskers = 1.5 times the interquartile range.**

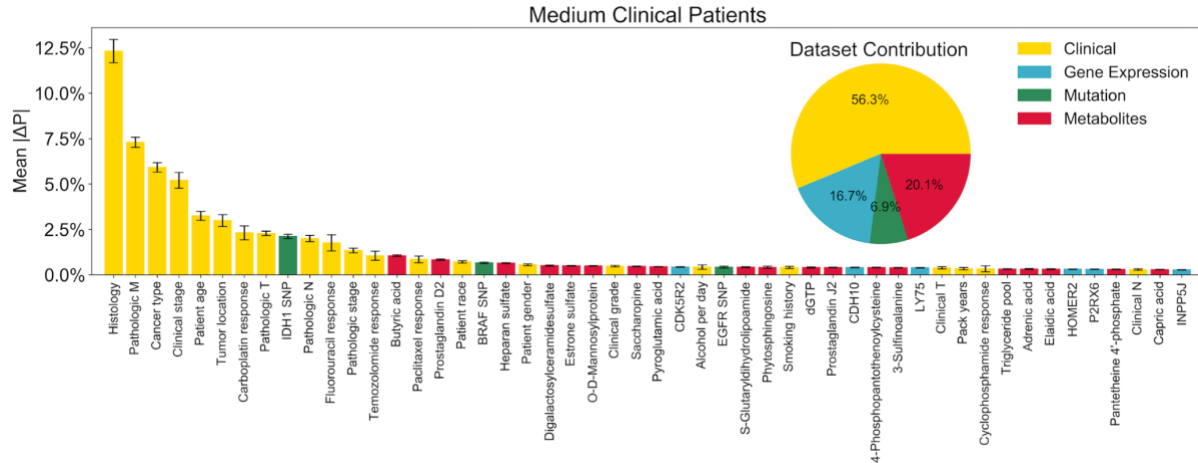

**Supplementary Fig. 15 | Top 50 features with largest mean  $|\Delta P|$  scores among samples within the “Medium Clinical” cluster. (Inset) Relative contribution of features from each dataset to the sum of total mean  $|\Delta P|$  scores, averaged across all samples within the “Medium Clinical” cluster. n = 324 samples. Error bars: mean  $\pm$  1 standard error.**

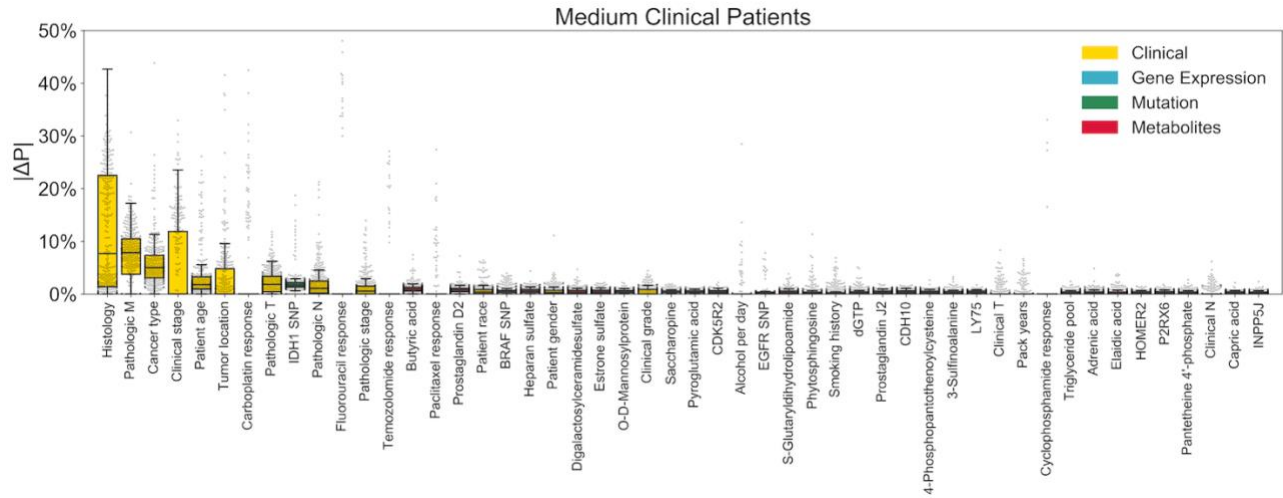

**Supplementary Fig. 16 | Top 50 features with largest mean  $|\Delta P|$  scores among samples within the “Medium Clinical” cluster, showing individual sample values.  $n = 324$  samples. Boxplots: box = 25<sup>th</sup>, 50<sup>th</sup>, and 75<sup>th</sup> percentiles, whiskers = 1.5 times the interquartile range.**



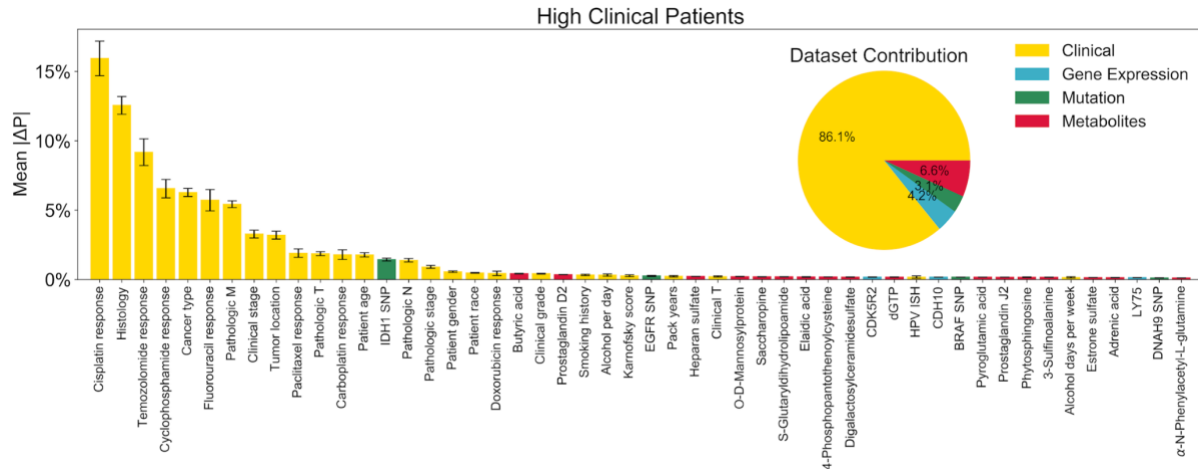

**Supplementary Fig. 17 | Top 50 features with largest mean  $|\Delta P|$  scores among samples within the “High Clinical” cluster. (Inset) Relative contribution of features from each dataset to the sum of total mean  $|\Delta P|$  scores, averaged across all samples within the “High Clinical” cluster. n = 331 samples. Error bars: mean  $\pm$  1 standard error.**

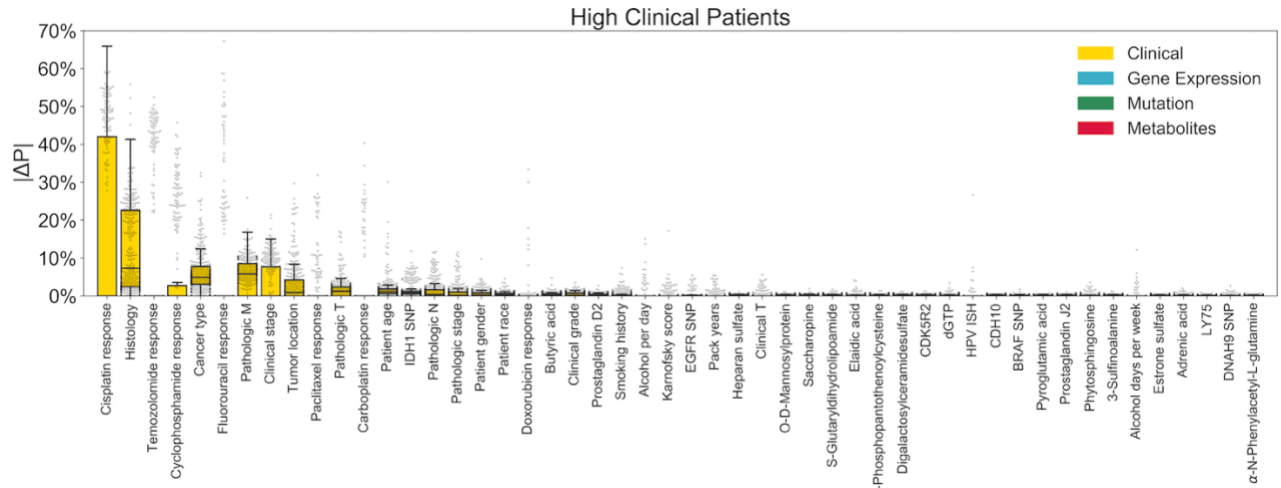

**Supplementary Fig. 18 | Top 50 features with largest mean  $|\Delta P|$  scores among samples within the “High Clinical” cluster, showing individual sample values.  $n = 331$  samples. Boxplots: box = 25<sup>th</sup>, 50<sup>th</sup>, and 75<sup>th</sup> percentiles, whiskers = 1.5 times the interquartile range.**

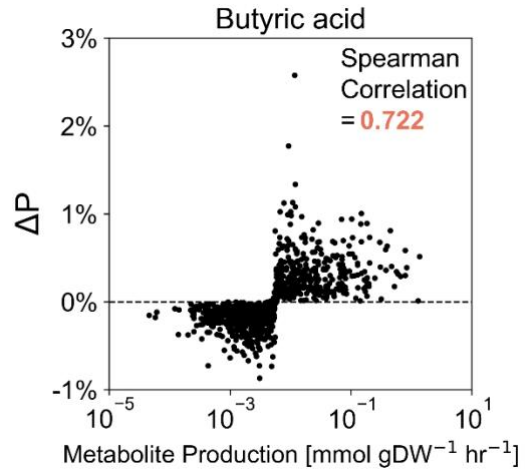

**Supplementary Fig. 19 | Regression between SHAP values and predicted metabolite production rate for a representative metabolite.** Values are shown for each individual patient tumor.

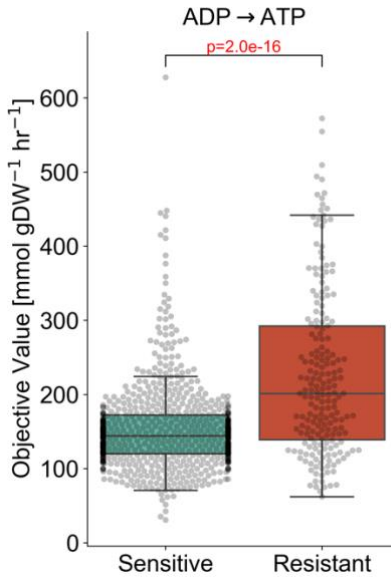

**Supplementary Fig. 20 | Comparison of FBA model-predicted maximal conversion of ADP to ATP between radiation-sensitive and -resistant TCGA tumors.** n = 716 radiation-sensitive samples, 199 radiation-resistant samples. Boxplots: box = 25<sup>th</sup>, 50<sup>th</sup>, and 75<sup>th</sup> percentiles, whiskers = 1.5 times the interquartile range. Statistical test: two-sided t-test.

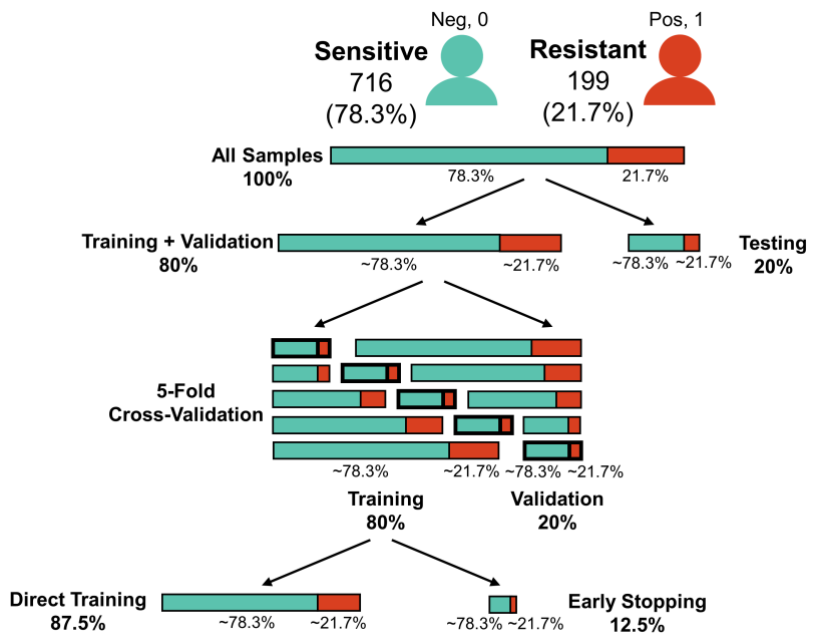

Supplementary Fig. 21 | Data splitting for classifier training and testing.

**Supplementary Tables:**

**Supplementary Table 1 | Overlapping genes among those with statistically-significant differential gene expression in the Keene et al. dataset and those among the 782 significant genes from our gene expression classifier trained on TCGA data.**

|        |        |         |       |        |        |
|--------|--------|---------|-------|--------|--------|
| ACER3  | DDR1   | FLNB    | ITPK1 | NAV2   | RPN1   |
| CDH1   | DGAT2  | GABRB3  | KRT18 | PRUNE2 | SEMA3F |
| CHD7   | ELFN2  | HSP90B1 | KRT23 | RCC2   | SPON1  |
| CHMP4C | ENTHD1 | ILDR2   | LRR8A | RDX    |        |

**Supplementary Table 2 | Matched radiation-sensitive and radiation-resistant cancer cell lines**

| <b>Cancer Type</b>   | <b>Radiation-Sensitive</b> | <b>Radiation-Resistant</b> | <b>Notes</b>                                                                                                           | <b>Source</b>                                                |
|----------------------|----------------------------|----------------------------|------------------------------------------------------------------------------------------------------------------------|--------------------------------------------------------------|
| Breast (BRCA)        | MDA-MB-231<br>NQO1 (-)     | MDA-MB-231<br>NQO1 (+)     | Stable NQO1 expression was restored in NQO1(-) cells to create NQO1(+) cells.                                          | Dr. David Boothman, Indiana University <sup>91</sup>         |
| Colon (COAD)         | SW620                      | SW480                      | Primary tumor (SW480) and lymph node metastasis (SW620) from the same patient, with different radiation sensitivities. | ATCC                                                         |
| Glioblastoma (GBM)   | M059J                      | M059K                      | Both isolated from same tumor specimen. M059J cells lack DNA-PK activity, rendering them more radiation-sensitive.     | ATCC                                                         |
| Head and Neck (HNSC) | SCC-61                     | rSCC-61                    | rSCC-61 cells were derived from SCC-61 cells after repeated radiation exposure and selection of surviving colonies.    | Dr. Cristina Furdul, Wake Forest University <sup>92,93</sup> |

**Supplementary Table 3 | Hyperparameter ranges for Bayesian optimization with gradient boosting machine classifiers.**

| <b>Parameter Name</b> | <b>Distribution</b> | <b>Lower Bound</b> | <b>Upper Bound</b> |
|-----------------------|---------------------|--------------------|--------------------|
| eta                   | log-uniform         | 0.01               | 0.5                |
| gamma                 | log-uniform         | 0                  | 5                  |
| max_depth             | uniform             | 1                  | 11                 |
| subsample             | uniform             | 0.5                | 1                  |
| colsample_bytree      | uniform             | 0.5                | 1                  |
| colsample_bylevel     | uniform             | 0.5                | 1                  |
| reg_lambda            | log-uniform         | 1                  | 4                  |
| reg_alpha             | log-uniform         | 0                  | 1                  |



**Supplementary Table 4 | Hyperparameter ranges for Bayesian optimization with the random forest classifier.**

| Parameter Name    | Distribution | Lower Bound   | Upper Bound |
|-------------------|--------------|---------------|-------------|
| n_estimators      | log-uniform  | 1             | 1000        |
| criterion         | choice       | entropy, gini |             |
| max_depth         | uniform      | 1             | 11          |
| min_samples_split | uniform      | 0             | 1           |
| min_samples_leaf  | uniform      | 0             | 0.5         |
| max_features      | choice       | log2, sqrt    |             |

**Supplementary Table 5 | Hyperparameter ranges for Bayesian optimization with the logistic regression classifier with L1 regularization.**

| <b>Parameter Name</b> | <b>Distribution</b> | <b>Lower Bound</b> | <b>Upper Bound</b> |
|-----------------------|---------------------|--------------------|--------------------|
| C                     | log-uniform         | 0.001              | 1000               |

**Supplementary Table 6 | Hyperparameter ranges for Bayesian optimization with the neural network classifier with L1 regularization.**

| Parameter Name      | Distribution | Lower Bound                        | Upper Bound |
|---------------------|--------------|------------------------------------|-------------|
| Number of layers    | uniform      | 1                                  | 5           |
| Neurons per layer   | choice       | 8, 16, 32, 64, 128, 256, 512, 1024 |             |
| activation_function | choice       | elu, relu, sigmoid                 |             |
| optimizer           | choice       | adam, rmsprop, sgd                 |             |
| l1                  | log-uniform  | 0.000001                           | 0.1         |
| dropout             | uniform      | 0                                  | 0.5         |
