# Supplementary material for: Integration of machine learning and genome-scale metabolic modeling identifies multi-omics biomarkers for radiation resistance
Source: Springer Nature journal article supplement (doi:10.1038/s41467-021-22989-1), 2021-05-11
Supplement: 41467_2021_22989_MOESM2_ESM.pdf [file 41467_2021_22989_MOESM2_ESM.pdf]

## **Description of Additional Supplementary Files**

File Name: Supplementary Data 1

Description: All supplementary data referenced within the main document. These files are also on Github including significant genes, mean SHAP values
